# Supplementary material
Source: PubMed Central journal article supplement (PMC4225183)
Supplement: NIHMS593964-supplement-01.pdf [file NIHMS593964-supplement-01.pdf]

## Appendix

**Supplemental Table 1: IM recurrence rates after consecutive biopsies with CEIM stratified by pre-treatment histology**

|                                          | <b>Pre-treatment Histology</b> |               |               |               |               |               |           | p-value |
|------------------------------------------|--------------------------------|---------------|---------------|---------------|---------------|---------------|-----------|---------|
|                                          | All patients (N=604)           | NDBE (N=201)  | IND (N=36)    | LGD (N=114)   | HGD (N=202)   | IMC (N=44)    | EAC (N=7) |         |
| # Recurrences, n (%)                     | 97 (16)                        | 24 (12)       | 6 (17)        | 19 (17)       | 39 (19)       | 8 (18)        | 1 (14)    |         |
| Time to recurrence, years; mean $\pm$ SD | 1.3 $\pm$ 0.8                  | 1.8 $\pm$ 1.3 | 1.2 $\pm$ 0.4 | 1.2 $\pm$ 0.5 | 1.2 $\pm$ 0.6 | 1.0 $\pm$ 0.4 | 1.0       | 0.03    |
| Recurrences/year                         | 10%                            | 6%            | 11%           | 11%           | 12%           | 13%           | 9%        | 0.10    |

NDBE, Non dysplastic Barrett's esophagus; IND, Indefinite for dysplasia; LGD, Low grade dysplasia; HGD, High grade dysplasia; IMC, Intramucosal carcinoma; EAC, Esophageal adenocarcinoma

**Supplemental Figure 1: Recurrence free survival in patients with consecutive biopsies showing CEIM (n=604)**

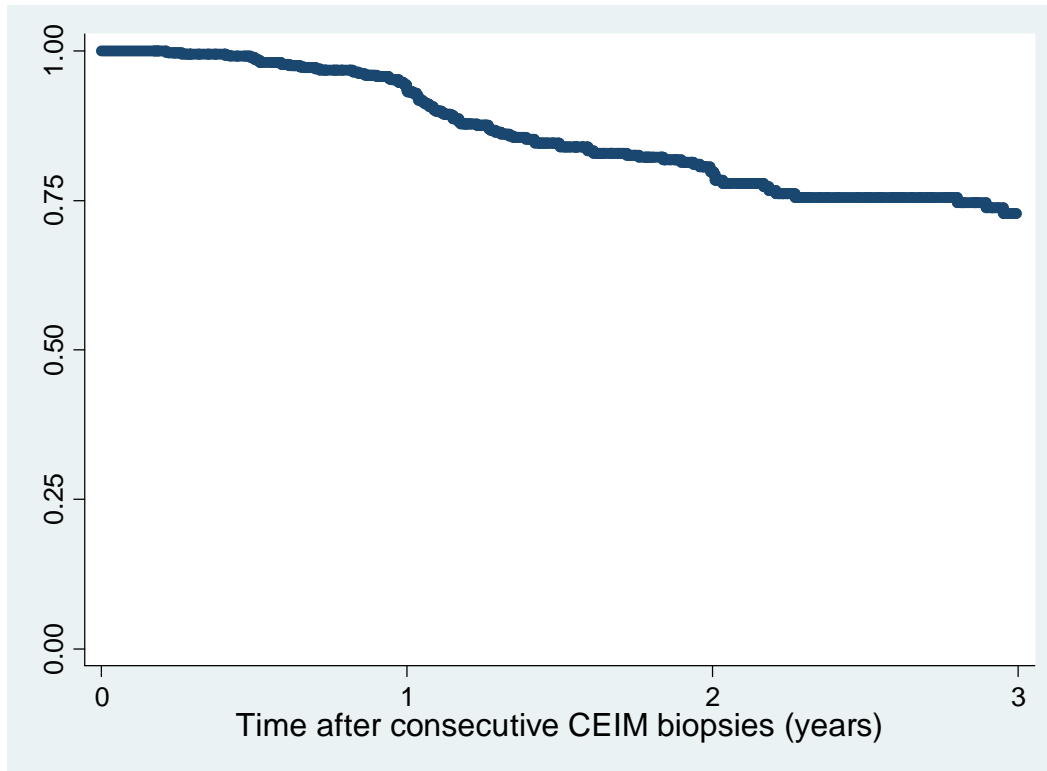

**Supplemental Figure 2: Recurrence free survival after consecutive biopsies showing CEIM grouped by pre-treatment histology (n=597)**

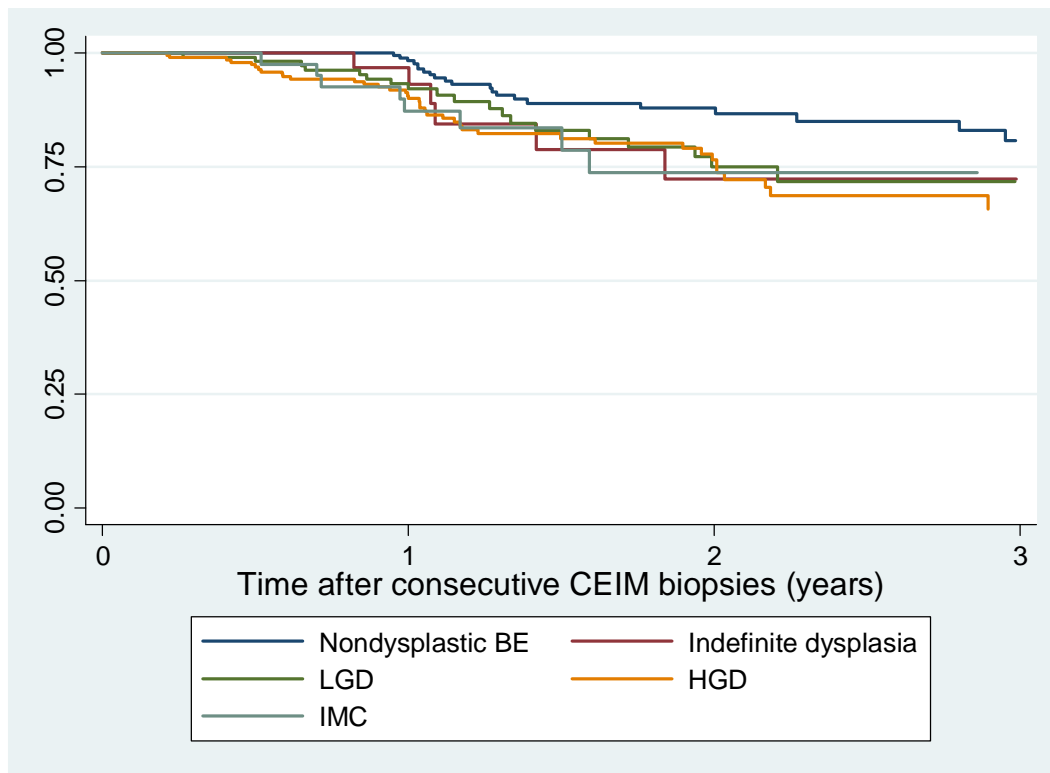

LGD, Low grade dysplasia; HGD, High grade dysplasia; IMC, Intramucosal Carcinoma
